# Supplementary material for: Renin‐Angiotensin‐Aldosterone System, Glucose Metabolism and Incident Type 2 Diabetes Mellitus: MESA
Source: PubMed Central journal article supplement — J Am Heart Assoc. 2018 Sep 4;7(17):e009890. doi: 10.1161/JAHA.118.009890 (PMC6201432; doi:10.1161/jaha.118.009890), 2018-09-04

# **SUPPLEMENTAL MATERIAL**

**Table S1. P for Interaction by Race.**

| P for interaction* | Association of Log-Aldosterone SD with Incident Diabetes (Continuous) † |          |                                                                                      |          |
|--------------------|-------------------------------------------------------------------------|----------|--------------------------------------------------------------------------------------|----------|
| Variables          | All Races                                                               |          | Non-Hispanic whites, African Americans & Hispanic Americans versus Chinese Americans |          |
|                    | Unadjusted                                                              | Adjusted | Unadjusted                                                                           | Adjusted |
| p-values           | p=0.2362                                                                | p=0.2447 | p=0.0489                                                                             | p=0.0885 |

\* P for interaction calculated using multiplicative interaction terms with application of the likelihood ratio test (p-value <0.10 considered statistically significant)

† Models adjusted for age, sex, education, study site, race, alcohol, physical activity, estimated glomerular filtration rate, systolic blood pressure

**Table S2. Characteristics of Participants in MESA by Race/Ethnicity.**

| Baseline Characteristics*                                          | All<br>n= 1570                                        | non-Hispanic<br>white<br>n= 682                       | Chinese American<br>n= 205                            | African American<br>n= 311                            | Hispanic American<br>n= 372                            | p-value  |
|--------------------------------------------------------------------|-------------------------------------------------------|-------------------------------------------------------|-------------------------------------------------------|-------------------------------------------------------|--------------------------------------------------------|----------|
| Age, years                                                         | 64.4 (9.7)                                            | 65.2 (9.6)                                            | 64.5 (10.0)                                           | 64.2 (9.9)                                            | 62.8 (9.6)                                             | p=0.0017 |
| Female, sex (%)                                                    | 802 (51)                                              | 333 (49)                                              | 101 (49)                                              | 175 (57)                                              | 193 (52)                                               | p=0.164  |
| Education ≥ Bachelor's Degree(%)                                   | 610 (39)                                              | 355 (52)                                              | 86 (42)                                               | 119 (38)                                              | 50 (13)                                                | p=0.001  |
| Current Alcohol use (%)                                            | 867 (55)                                              | 483 (71)                                              | 69 (33)                                               | 153 (49)                                              | 162 (44)                                               | p=0.001  |
| Exercise Physical Activity<br>(met-min/week)                       | 1430 (1844)                                           | 1561 (1775)                                           | 1282 (1630)                                           | 1593 (2408)                                           | 1137 (1461)                                            | p=0.0008 |
| Ace-inhibitor or ARB (%)                                           | 299 (19)                                              | 138 (20)                                              | 32 (16)                                               | 72 (23)                                               | 57 (15)                                                | p=0.030  |
| Body-mass index<br>(kilograms/meter <sup>2</sup> )                 | 27.7 (4.9)                                            | 27.4 (4.7)                                            | 23.9 (3.2)                                            | 29.2 (5.3)                                            | 29.1 (4.6)                                             | p<0.0001 |
| Waist circumference (cm)                                           | 97.1 (13.5)                                           | 97.9 (13.4)                                           | 86.5 (9.3)                                            | 98.8 (14.4)                                           | 100.1 (12.4)                                           | p<0.0001 |
| Systolic blood pressure (mmHg)                                     | 123 (20)                                              | 120 (19)                                              | 120 (19)                                              | 129 (21)                                              | 124 (21)                                               | p<0.0001 |
| Diastolic blood pressure (mmHg)                                    | 70 (10)                                               | 69 (9)                                                | 70 (9)                                                | 73 (11)                                               | 71 (10)                                                | p<0.0001 |
| Glucose (mg/dL)                                                    | 5.05 (0.56),<br>91 (10)                               | 5.00 (0.50),<br>90 (9)                                | 5.16 (0.56),<br>93 (10)                               | 5.05 (0.61),<br>91 (11)                               | 5.11 (0.56),<br>92 (10)                                | p<0.0001 |
| Creatinine (μmol/L, mg/dL)                                         | 83.10 (19.45),<br>0.94 (0.22)                         | 84.86 (17.68),<br>0.96 (0.20)                         | 76.91 (17.68),<br>0.87 (0.20)                         | 89.28 (23.87),<br>1.01 (0.27)                         | 77.79 (17.68),<br>0.88 (0.20)                          | p<0.0001 |
| eGFR CKD-Epi (mL/s/m <sup>2</sup> ,<br>mL/min/1.73m <sup>2</sup> ) | 1.32 (0.27),<br>79 (16)                               | 1.25 (0.25),<br>75 (15)                               | 1.37 (0.27),<br>82 (16)                               | 1.37 (0.32),<br>82 (19)                               | 1.37 (0.25),<br>82 (15)                                | p<0.0001 |
|                                                                    | median, interquartile range                           |                                                       |                                                       |                                                       |                                                        |          |
| Aldosterone (pmol/L, pg/mL)<br>(n=1,548) †                         | 363.12<br>(260.48, 507.36),<br>130.9<br>(93.9, 182.9) | 378.10<br>(272.13, 522.62),<br>136.3<br>(98.1, 188.4) | 358.40<br>(276.29, 471.30),<br>129.2<br>(99.6, 169.9) | 313.18<br>(222.20, 460.76),<br>112.9<br>(80.1, 166.1) | 383.64<br>(279.34, 546.76),<br>138.3<br>(100.7, 197.1) | p=0.0001 |
| Plasma Renin activity (PRA) ‡<br>(ng/ml/hour)                      | 0.5 (0.3, 1.1)                                        | 0.6 (0.3, 1.2)                                        | 0.5 (0.3, 0.9)                                        | 0.3 (0.2, 0.7)                                        | 0.6 (0.3, 1.2)                                         | p=0.0001 |
| Homeostatic model assessment -<br>insulin resistance §             | 0.81 (0.57, 1.16)                                     | 0.77 (0.54, 1.09)                                     | 0.70 (0.50, 0.99)                                     | 0.84 (0.57, 1.23)                                     | 0.92 (0.68, 1.41)                                      | p=0.0001 |
| Homeostatic model assessment2<br>– β-cell function (%) §           | 81.5<br>(66.5, 102.9)                                 | 80.3<br>(64.9, 102.8)                                 | 72.3<br>(58.5, 86.7)                                  | 84.3<br>(69.0, 103.0)                                 | 88.1<br>(70.4, 112)                                    | p=0.0001 |
| Interleukin-6 (pg/mL)                                              | 1.8 (1.2, 2.7)                                        | 1.7 (1.2, 2.5)                                        | 1.3 (0.9, 2.1)                                        | 1.9 (1.2, 3.0)                                        | 2.0 (1.3, 3.2)                                         | p=0.0001 |
| High sensitivity C-reactive protein<br>(mg/L) ¶                    | 1.4 (0.7, 3.2)                                        | 1.3 (0.7, 2.7)                                        | 0.8 (0.5, 1.4)                                        | 1.8 (0.9, 4.5)                                        | 1.9 (0.9, 3.9)                                         | p=0.0001 |
| Tumor necrosis factor-α (pg/mL) #                                  | 4.5 (3.4, 6.2)                                        | 4.7 (3.4, 6.3)                                        | 4.1 (3.2, 5.6)                                        | 4.4 (3.4, 6.2)                                        | 4.7 (3.7, 6.4)                                         | p=0.0026 |

|                                               |                        |                        |                        |                        |                        |          |
|-----------------------------------------------|------------------------|------------------------|------------------------|------------------------|------------------------|----------|
| Adiponectin (ng/mL)                           | 17973<br>(12347,26678) | 22093<br>(14480,30685) | 14426<br>(10002,21983) | 15233<br>(10484,22669) | 17544<br>(12722,24529) | p=0.0001 |
| Leptin (pg/mL) **                             | 13006<br>(5455, 27881) | 10940<br>(5075, 23020) | 7086<br>(2865, 14170)  | 22005<br>(9020, 42914) | 16087<br>(6379, 28604) | p=0.0001 |
| Number of Incident Diabetes Cases             | 116                    | 41                     | 19                     | 28                     | 28                     |          |
| Incidence of Diabetes (per 1000 person-years) | 7.8 (6.5, 9.3)         | 6.3 (4.6, 8.5)         | 9.7 (6.2, 15.2)        | 9.8 (6.8, 14.2)        | 8.0 (5.5, 11.5)        |          |

**Table S3. The Association of log Aldosterone and log Plasma Renin Activity with Fasting Plasma Glucose by Race/Ethnicity.**

| Log-Aldosterone<br>(Continuous)              | Fasting Plasma Glucose - Linear Regression $\beta$ Coefficients* |                    |                    |                    |
|----------------------------------------------|------------------------------------------------------------------|--------------------|--------------------|--------------------|
|                                              | Unadjusted                                                       | Model 1            | Model 2            | Model 3            |
| All<br>(n=1548)                              | 2.15 (1.22, 3.08)                                                | 2.75 (1.83, 3.68)  | 2.54 (1.64, 3.44)  | 2.58 (1.69, 3.48)  |
| non-Hispanic white<br>(n=674)                | 2.10 (0.78, 3.43)                                                | 2.71 (1.37, 4.05)  | 2.16 (0.86, 3.46)  | 2.27 (0.96, 3.57)  |
| Chinese American<br>(n=204)                  | 3.53 (0.69, 6.38)                                                | 4.27 (1.46, 7.07)  | 3.84 (1.09, 6.59)  | 3.81 (1.06, 6.57)  |
| African American<br>(n=301)                  | 2.37 (0.13, 4.61)                                                | 3.33 (1.07, 5.59)  | 3.26 (1.04, 5.48)  | 3.20 (0.98, 5.42)  |
| Hispanic American<br>(n=369)                 | 1.59 (-0.35, 3.52)                                               | 1.56 (-0.35, 3.48) | 1.77 (-0.10, 3.64) | 1.86 (-0.02, 3.73) |
| Log-Plasma Renin<br>Activity<br>(Continuous) | Fasting Plasma Glucose - Linear Regression $\beta$ Coefficients* |                    |                    |                    |
| All<br>(n=1,474)                             | 0.90 (0.48, 1.31)                                                | 1.16 (0.75, 1.58)  | 1.06 (0.66, 1.47)  | 1.04 (0.61, 1.47)  |
| non-Hispanic white<br>(n=643)                | 1.11 (0.55, 1.67)                                                | 1.39 (0.83, 1.95)  | 1.22 (0.68, 1.77)  | 1.31 (0.71, 1.91)  |
| Chinese American<br>(n=200)                  | 0.80 (-0.43, 2.02)                                               | 1.14 (-0.09, 2.37) | 0.82 (-0.40, 2.04) | 0.72 (-0.61, 2.05) |
| African American<br>(n=281)                  | 1.10 (0.03, 2.17)                                                | 1.03 (-0.05, 2.10) | 0.92 (-0.14, 1.98) | 0.84 (-0.28, 1.95) |
| Hispanic American<br>(n=350)                 | 0.53 (-0.41, 1.47)                                               | 0.75 (-0.20, 1.68) | 0.81 (-0.11, 1.73) | 0.77 (-0.18, 1.71) |

Models:

Model 1: age, education, sex, study site, race, alcohol, physical activity, estimated glomerular filtration rate and systolic blood pressure

Model 2: Model 1 + waist circumference (cm)

Model 3: Model 2 + angiotensin converting enzyme inhibitors and angiotensin receptor blockers

\* Linear Regression - a 100% increase in aldosterone or plasma renin activity is associated with an X mg/dL increase in glucose and a 100% increase in aldosterone or plasma renin activity results in a 100 times X percent increase in HOMA-IR or HOMA- $\beta$ , where X equals the  $\beta$ -coefficient.

**Figure S1. Multiethnic Study of Atherosclerosis (MESA) Calcified Renal Artery Atherosclerosis Ancillary Study Consort Flow Diagram.**

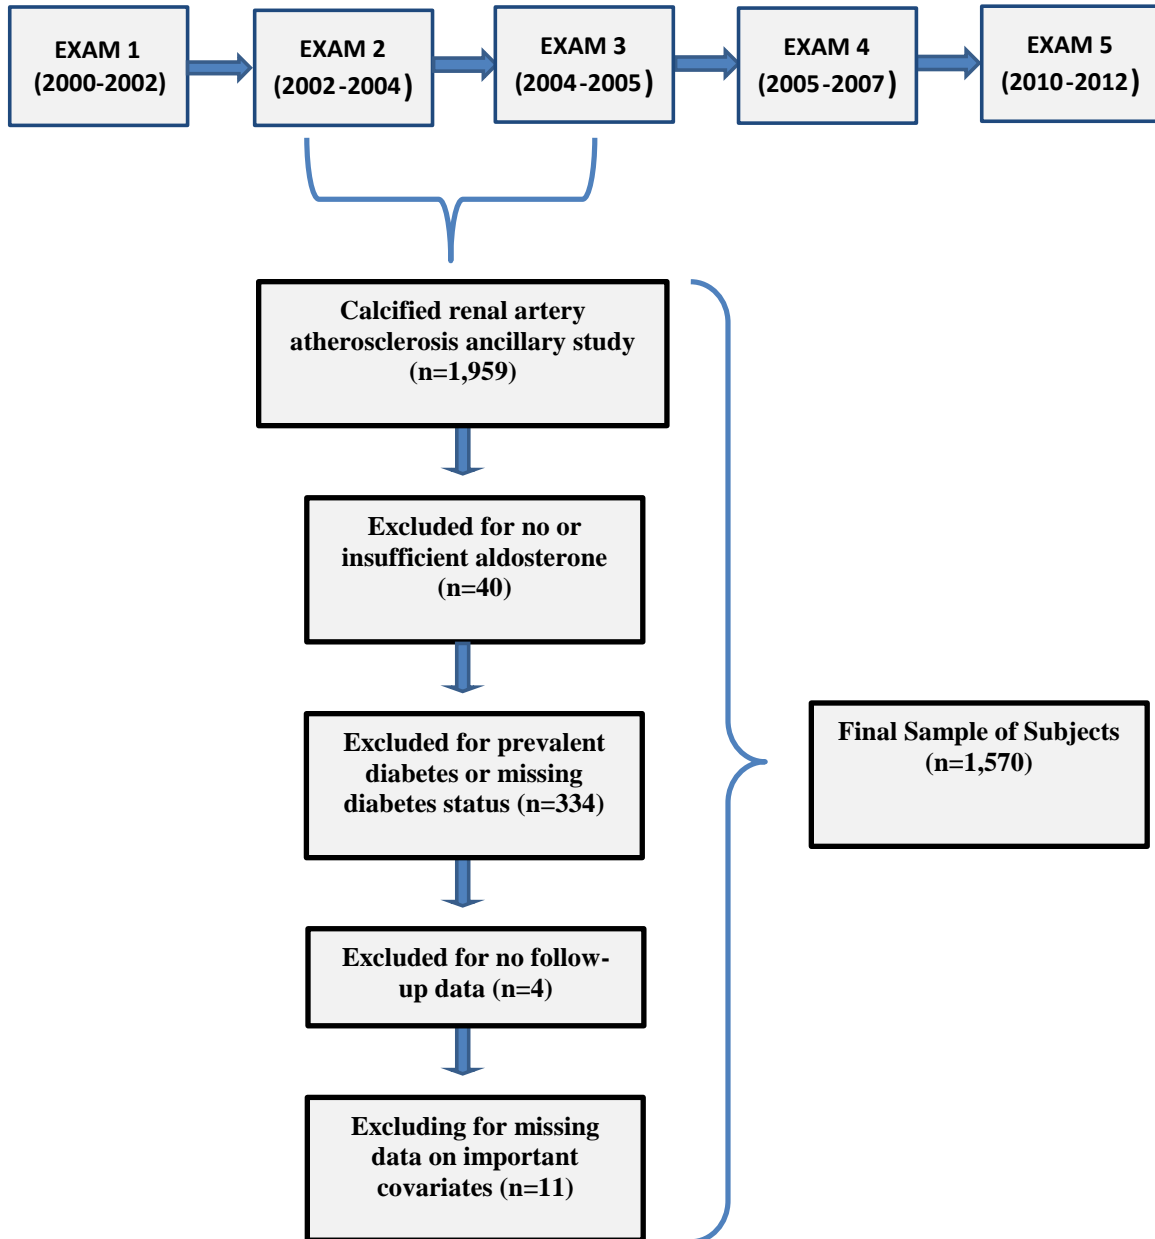

Supplement: JAH3-7-e009890-s001.pdf [file JAH3-7-e009890-s001.pdf]
